# Supplementary material
Source: publisher site journal article supplement (https://www.dovepress.com/article/234856)
Supplement: Supplementary file 1 [file get_supplementary_file.php]

1. What is your age? _______
2. What is your biological sex? M/F
3. Are you married? Y/N
4. Do you have any children? Y/N
   1. If yes, how many? ______
5. Do you have any siblings? Y/N
   1. If yes, how many? ______
6. Do you have any extended family below the age of 10?
   1. If yes, how many? ______
   2. How often do you interact with them?

Daily/ weekly/ fornightly/ monthly/ every 2 months/ every 6 months/ yearly/ once every few years/ never

1. Are you part of the Follow My Footsteps programme?
2. From the age of 16, have you ever worked with children in a professional or volunteering setting? (Tutoring, Scouts, Teddybear hospital etc) Y/N
   1. If yes, please fill in the table

| Role | Age range of children | How many contact hours every month? | How long did you do this for? |
| --- | --- | --- | --- |
|  |  |  |  |
|  |  |  |  |
|  |  |  |  |

**Suppl Figure 1.** Administered Questionnaire prior to the paediatric placement

1. I am confident in verbally I am confident in verbally communicating with children
2. I am confident physically engaging with children.
3. I am confident with asking sensitive or probing questions to children.
4. I am confident demonstrating basic medical procedures to children.
5. I am confident interacting with parents.
6. I am confident explaining medical conditions to children
7. I am confident explaining medical management to children.
8. I am confident explaining medical conditions to parents.
9. I am confident explaining medical management to parents.
10. I am confident that I can recognise a sick child.

**How much do you agree with the following statements?**

*(1 = Not at all confident; 10 = Very confident)*

**Suppl Figure 2.** Administered Self-Confidence Questionnaire prior to and after the paediatric placement

**Suppl Figure 3.** Mean levels of self-confidence across 10 questions in all participants before and after paediatric placement (n=62)
